# Supplementary material for: Repeatability of Corneal Epithelial Thickness Map Using Anterior-Segment Optical Coherence Tomography in Normal and Corneal Disease Patients
Source: PubMed Central journal article supplement — Korean J Ophthalmol. 2024 Oct 22;38(6):496–506. doi: 10.3341/kjo.2024.0115 (PMC11647090; doi:10.3341/kjo.2024.0115), 2024-10-22
Supplement: kjo-2024-0115-Supplementary-Fig-2.pdf [file kjo-2024-0115-Supplementary-Fig-2.pdf]

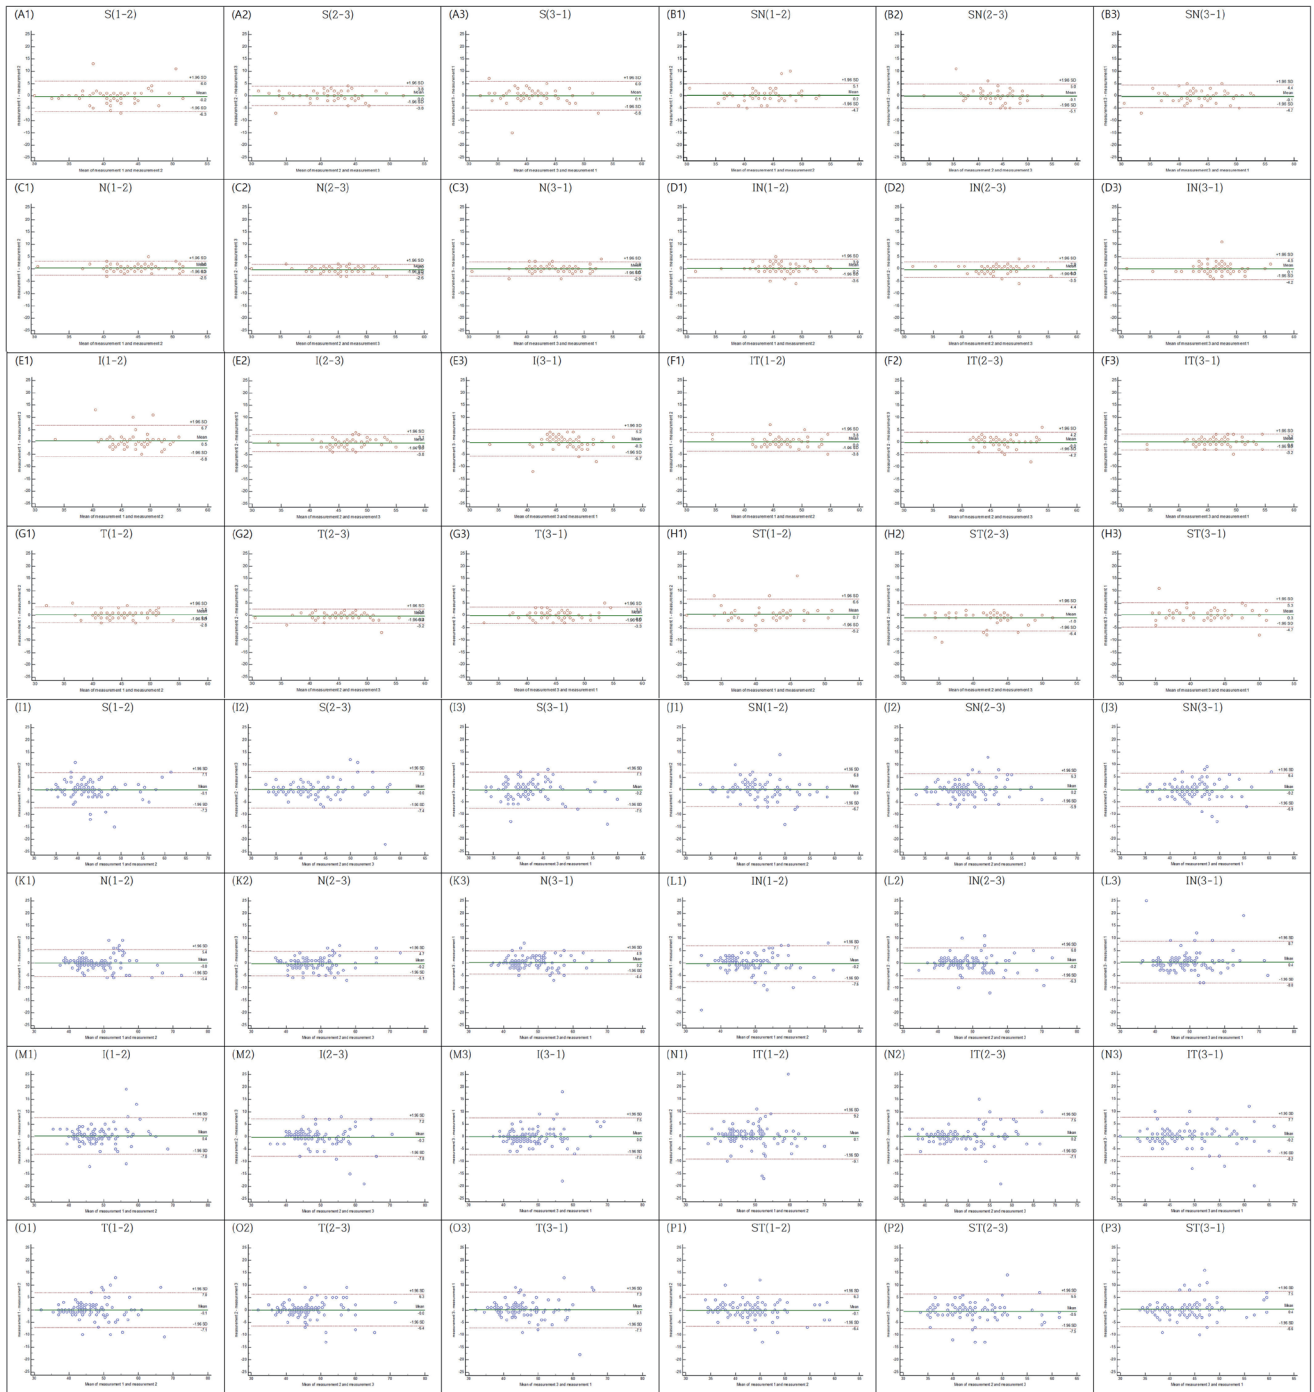

**Supplementary Fig. 2.** Bland-Altman plots of three pairs in each sector of 5–7 mm diameter in normal and corneal disease eyes. Normal eyes: (A1–A3) superior (S); (B1–B3) superior nasal (SN); (C1–C3) nasal (N); (D1–D3) inferior nasal (IN); (E1–E3) inferior (I); (F1–F3) inferior temporal (IT); (G1–G3) temporal (T); and (H1–H3) superior temporal (ST). Corneal disease eyes: (I1–I3) S; (J1–J3) SN; (K1–K3) N; (L1–L3) IN; (M1–M3) I; (N1–N3) IT; (O1–O3) T; and (P1–P3) ST. The mean difference (continuous line), lower and upper 95% limits of agreement (peripheral dotted lines) are depicted.
